# Supplementary material for: Prognostic value of molecular cytology by one-step nucleic acid amplification (OSNA) assay of peritoneal washings in advanced gastric cancer patients
Source: PubMed Central journal article supplement (PMC9304381; doi:10.1038/s41598-022-16761-8), 2022-07-21
Supplement: 41598_2022_16761_MOESM1_ESM.pdf [file 41598_2022_16761_MOESM1_ESM.pdf]

**Supplementary table 1.** Comparison of OSNA assessment results depending on distribution of demographic and clinical variables.

| <b>Variable</b>                                                                   | <b>OSNA<br/>negative<br/>(n=57)</b>                                                                           | <b>OSNA<br/>positive<br/>(n=25)</b>                                                                  | <b><i>p</i></b> |
|-----------------------------------------------------------------------------------|---------------------------------------------------------------------------------------------------------------|------------------------------------------------------------------------------------------------------|-----------------|
| <b>Sex</b><br>Men<br>Women                                                        | 29 (65.9%)<br>28 (73.7%)                                                                                      | 15 (34.1%)<br>10 (26.3%)                                                                             | 0,6016          |
| <b>Age</b><br><65 years<br>≥65 years                                              | 28 (68.3%)<br>29 (70.7%)                                                                                      | 13 (31.7%)<br>12 (29.3%)                                                                             | 1.0000          |
| <b>Lauren`s type</b><br>Intestinal<br>Mixed<br>Diffuse<br>Unknown                 | 26 (74.3%)<br>10 (62.5%)<br>14 (63.6%)<br>9 (%)                                                               | 9 (25.7%)<br>6 (37.5%)<br>8 (36.4%)<br>-                                                             | 0.1671          |
| <b>(y)pT</b><br>0<br>1<br>2<br>3<br>4a<br>4b                                      | 7 (100%)<br>9 (75%)<br>8 (72.7%)<br>17 (58.6%)<br>13 (86.7%)<br>2 (28.6%)                                     | -<br>3 (25%)<br>3 (27.3%)<br>12 (41.4%)<br>2 (13.3%)<br>5 (71.4%)                                    | 0.0292*         |
| <b>(y)pN</b><br>0<br>1<br>2<br>3a<br>3b                                           | 27 (73%)<br>11 (84.6%)<br>9 (75%)<br>8 (53.3%)<br>2 (40%)                                                     | 10 (27%)<br>2 (15.4%)<br>3 (25%)<br>7 (46.7%)<br>3 (60%)                                             | 0.2238          |
| <b>(y)pM</b><br>0<br>1                                                            | 54 (76.1%)<br>3 (27.3%)                                                                                       | 17 (23.9%)<br>8 (72.7%)                                                                              | 0.0035*         |
| <b>(y)pTNM stage</b><br>0<br>IA<br>IB<br>IIA<br>IIB<br>IIIA<br>IIIB<br>IIIC<br>IV | 8 (100%)<br>9 (75%)<br>4 (66.7%)<br>5 (50%)<br>11 (91.7%)<br>4 (66.7%)<br>9 (81.8%)<br>4 (66.7%)<br>3 (27.3%) | -<br>3 (25%)<br>2 (33.3%)<br>5 (50%)<br>1 (8.3%)<br>2 (33.3%)<br>2 (18.2%)<br>2 (33.3%)<br>8 (72.7%) | 0.0186*         |
| <b>Noadjuvant<br/>chemotherapy</b><br>Yes<br>No                                   | 42 (67.7%)<br>15 (75%)                                                                                        | 20 (32.3%)<br>5 (25%)                                                                                | 0.7385          |
| <b>Tumour Regression<br/>Grade</b><br>1<br>2<br>3<br>4                            | 6 (100%)<br>9 (60%)<br>18 (72%)<br>9 (60%)                                                                    | -<br>6 (40%)<br>7 (28%)<br>6 (40%)                                                                   | 0.2614          |

|                            |            |            |        |
|----------------------------|------------|------------|--------|
| <b>Type of gastrectomy</b> | 11 (78.6%) | 3 (21.4%)  | 0.4943 |
| Proximal                   | 26 (72.2%) | 10 (27.8%) |        |
| Distal                     | 20 (62.5%) | 12 (37.5%) |        |
| Total                      |            |            |        |
| <b>Cytology</b>            |            |            | 0.1238 |
| positive                   | 2 (33.3%)  | 4 (66.7%)  |        |
| negative                   | 55 (72.4%) | 21 (27.6%) |        |

Abbreviations: (y)pT – (postneoadjuvant) pathological primary tumour stage, (y)pN - (postneoadjuvant) pathological nodal stage, (y)pM - (postneoadjuvant) pathological distant metastasis stage, (y)pTNM - (postneoadjuvant) pathological tumour, node, metastasis, OSNA - One-Step Nucleic Acid Amplification Assay; \* - statistically significant results.
